# Supplementary material for: TLNRD1 is a CCM complex component and regulates endothelial barrier integrity
Source: PubMed Central journal article supplement (PMC11252447; doi:10.1083/jcb.202310030), 2024-07-16

**Figure 1D**

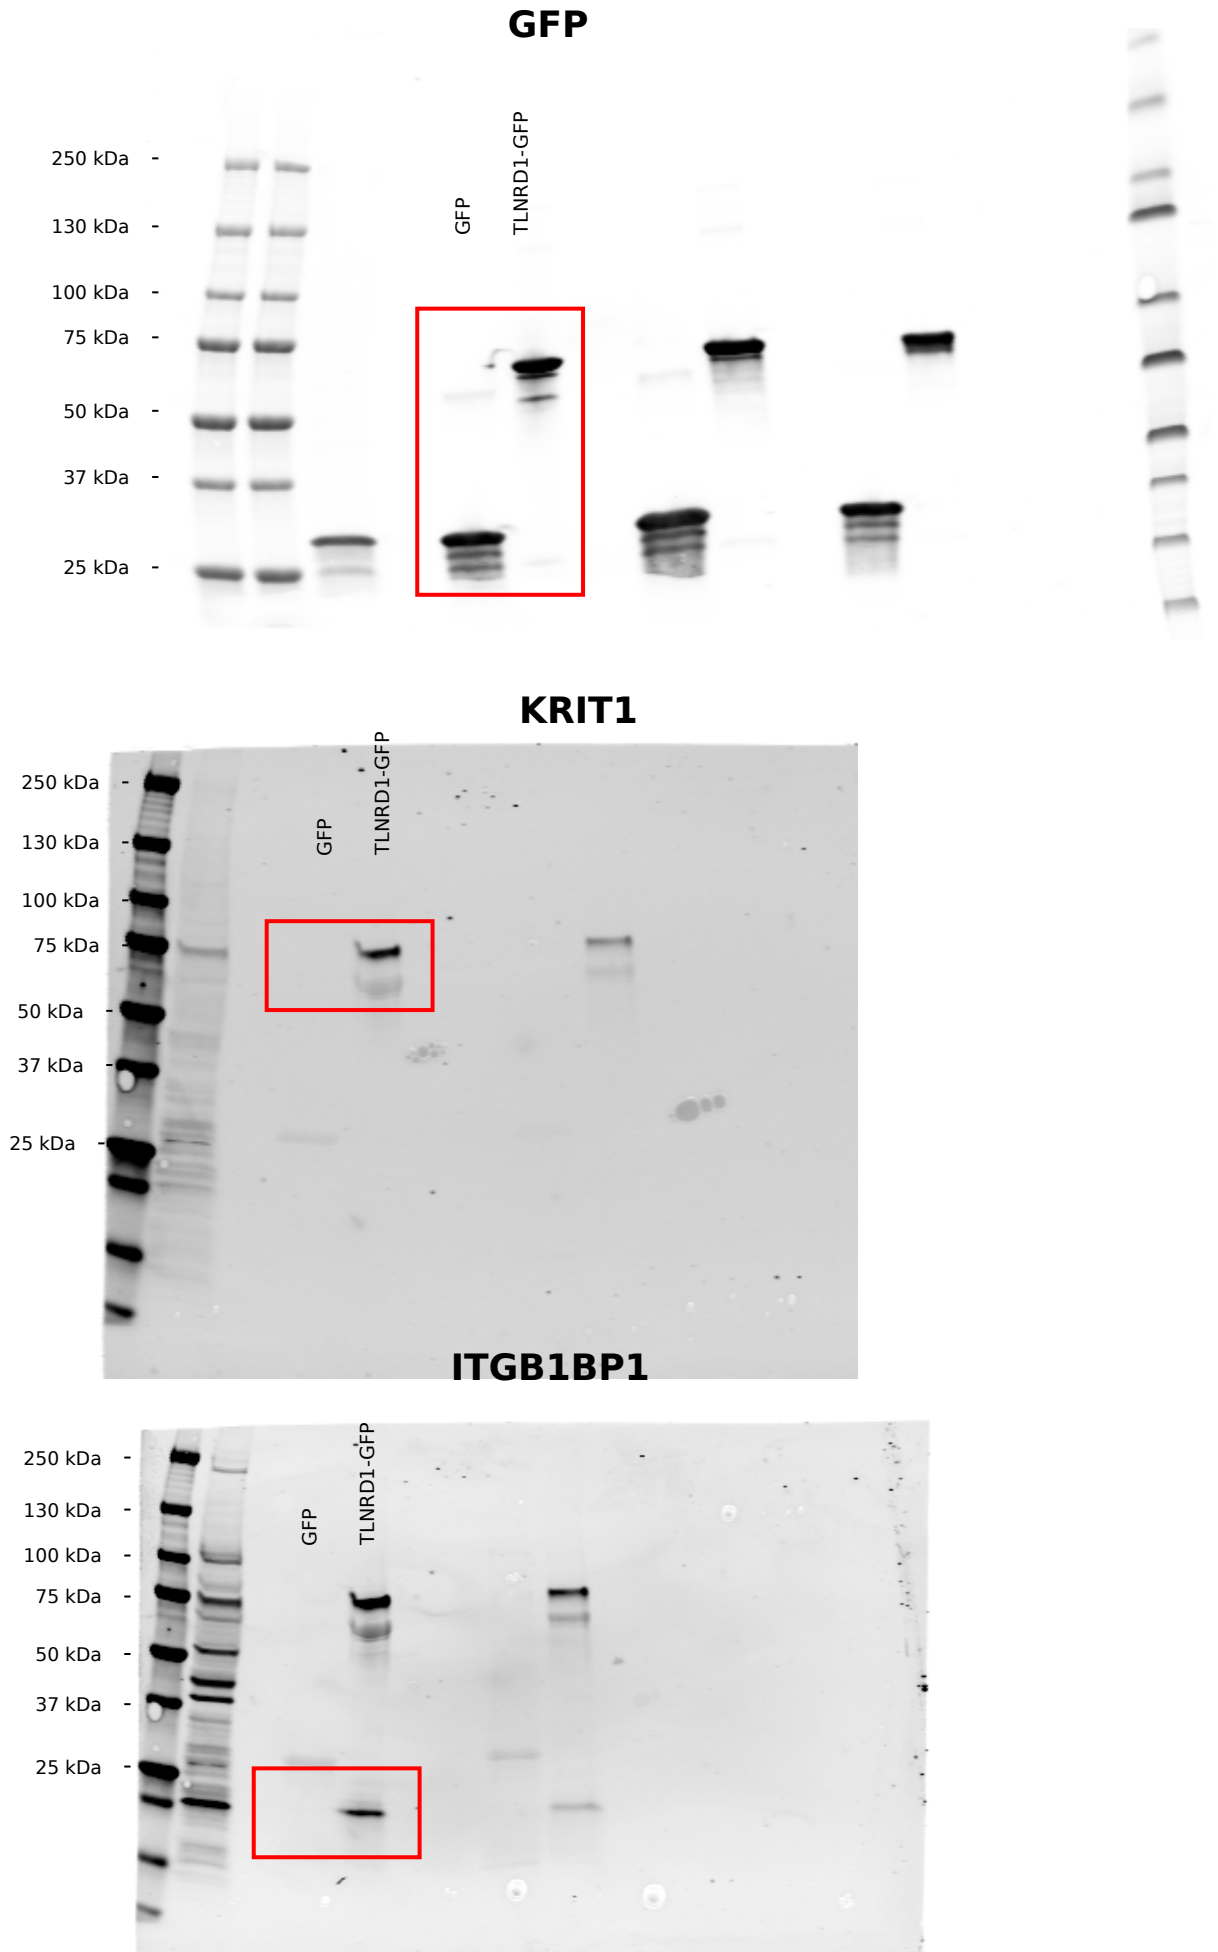

Supplement: JCB_202310030_SourceDataF1.pdf [file JCB_202310030_SourceDataF1.pdf]
