# Supplementary material for: TLNRD1 is a CCM complex component and regulates endothelial barrier integrity
Source: PubMed Central journal article supplement (PMC11252447; doi:10.1083/jcb.202310030), 2024-07-16

**Figure 4D**

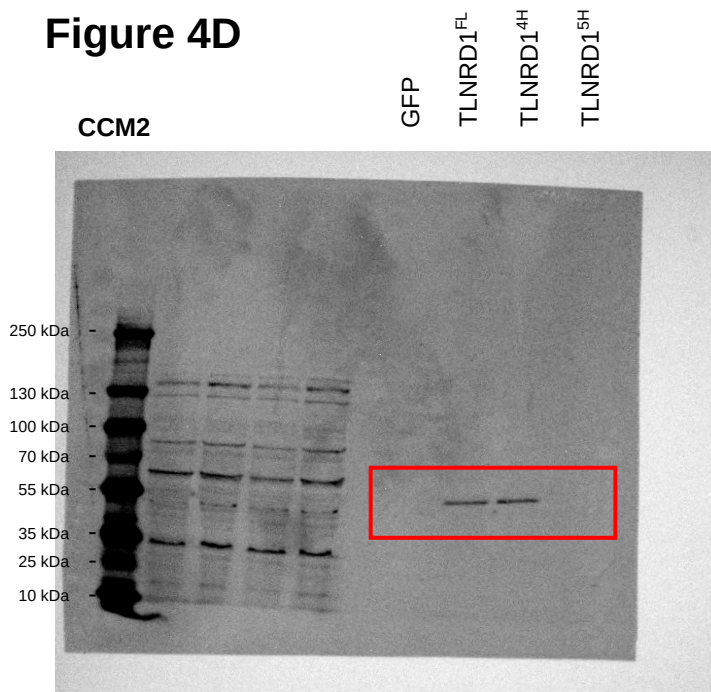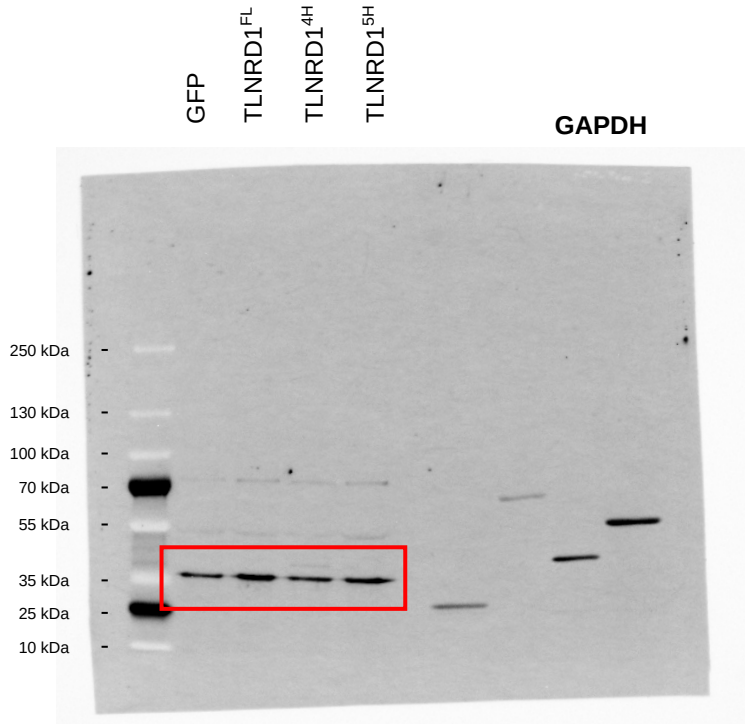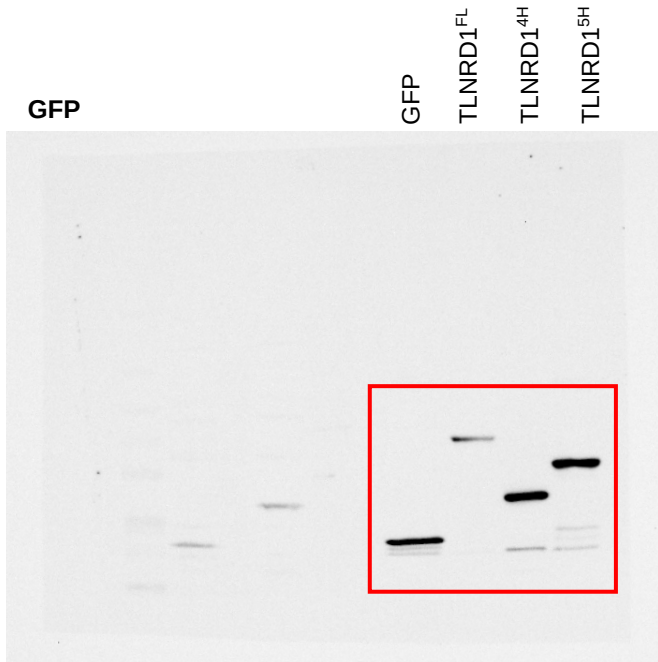

**Figure 4F**

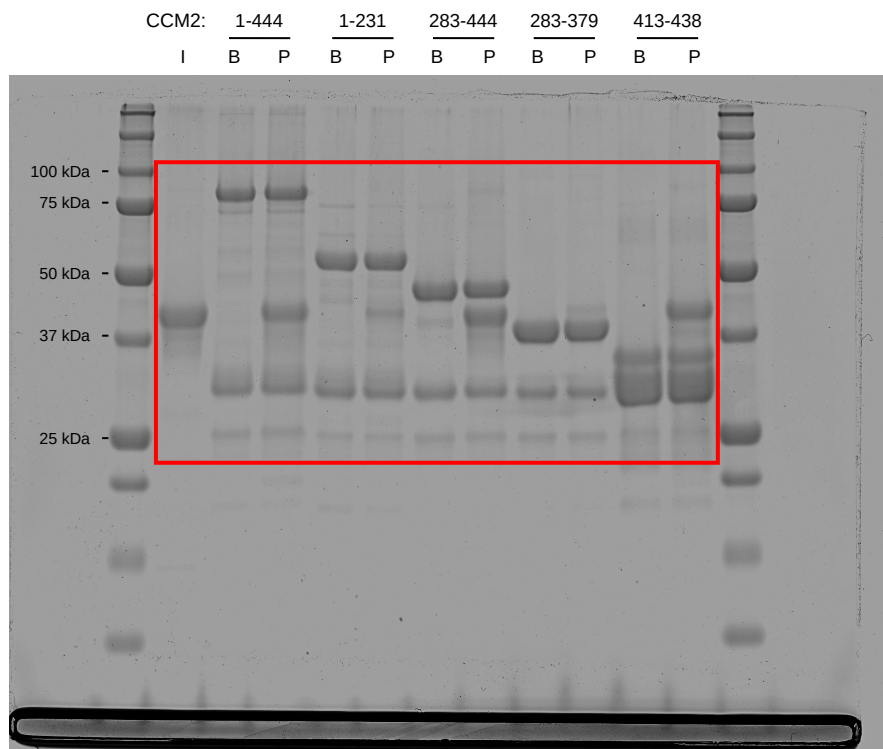

Supplement: JCB_202310030_SourceDataF4.pdf [file JCB_202310030_SourceDataF4.pdf]
