# Supplementary material for: TLNRD1 is a CCM complex component and regulates endothelial barrier integrity
Source: PubMed Central journal article supplement (PMC11252447; doi:10.1083/jcb.202310030), 2024-07-16

Figure 7D

WT

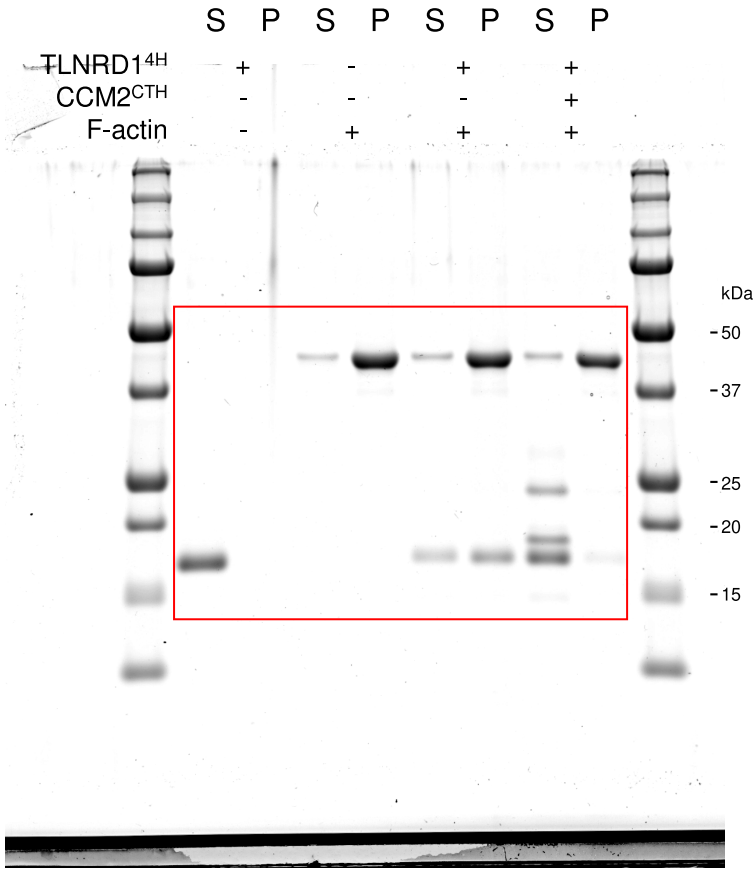

2T

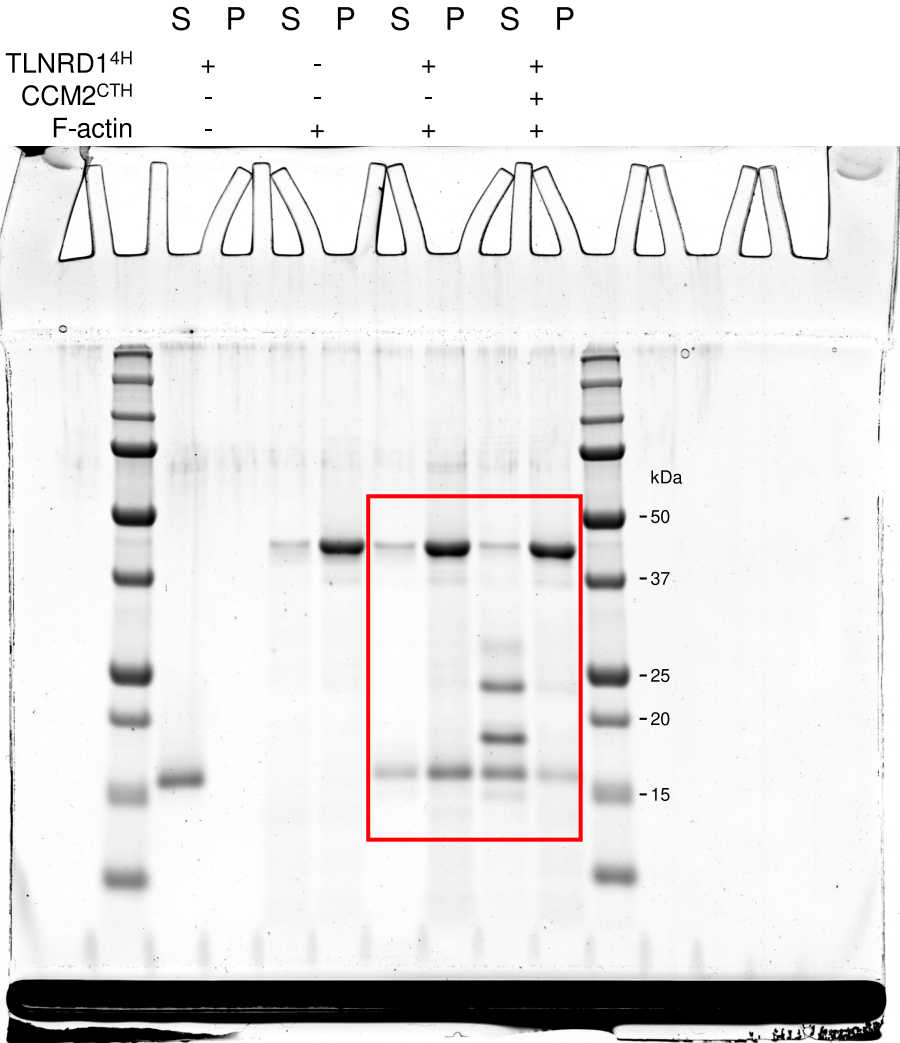

Figure 7D

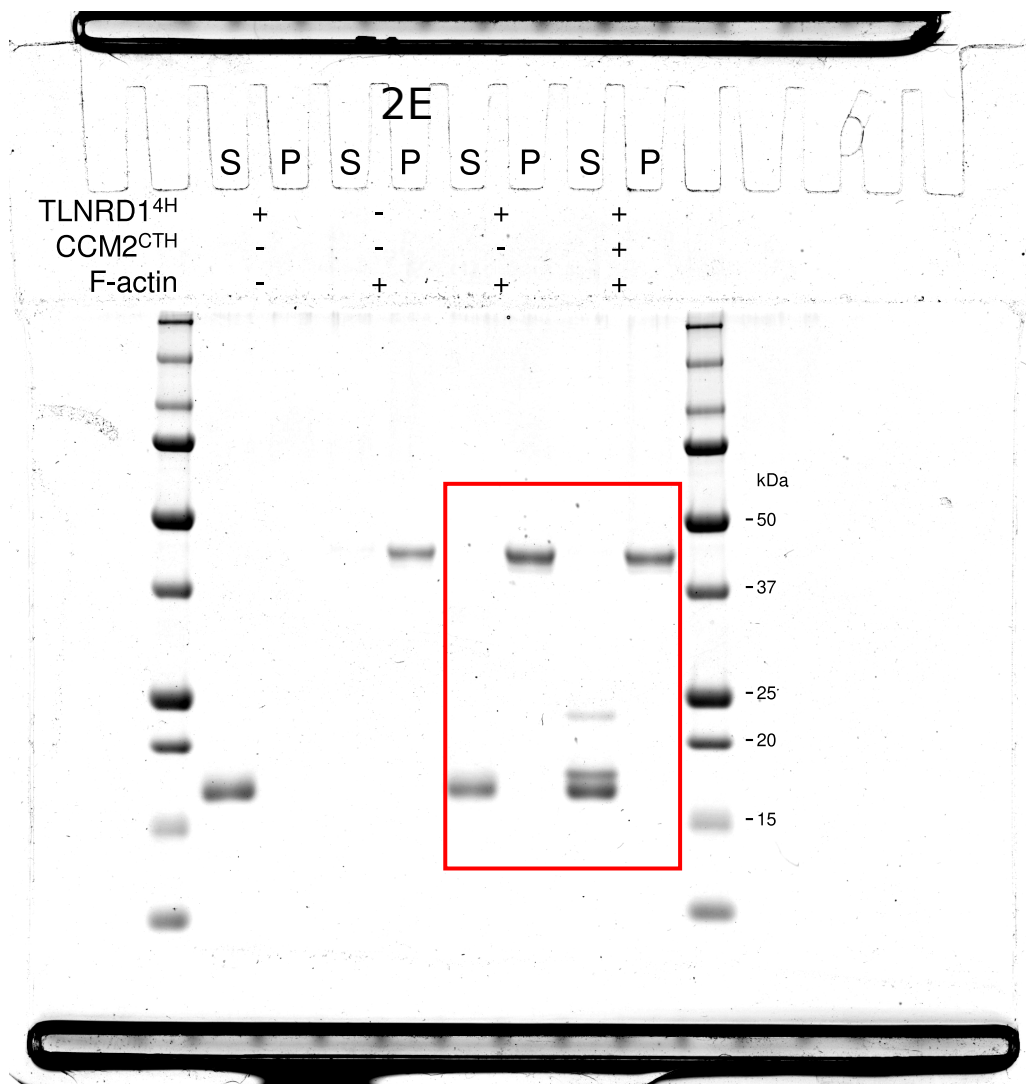

Figure 7E

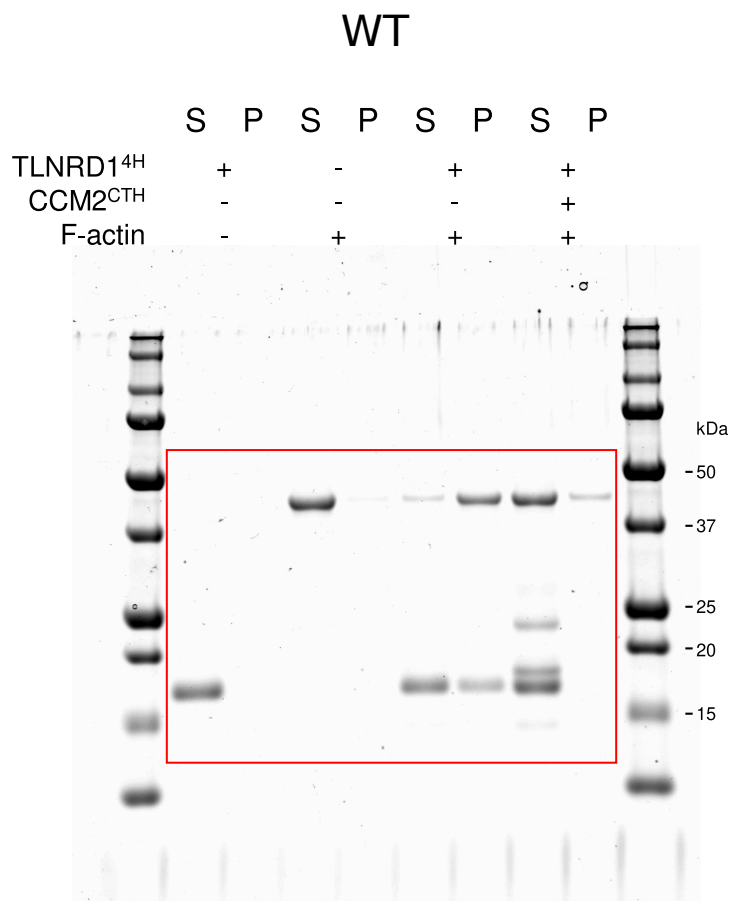

Figure 7E

2T

|                      | S | P | S | P | S | P | S | P |
|----------------------|---|---|---|---|---|---|---|---|
| TLNRD1 <sup>4H</sup> | + | - | - | + | + | - | - | + |
| CCM2 <sup>CTH</sup>  | - | - | - | - | - | - | - | + |
| F-actin              | - | + | + | + | + | + | + | + |

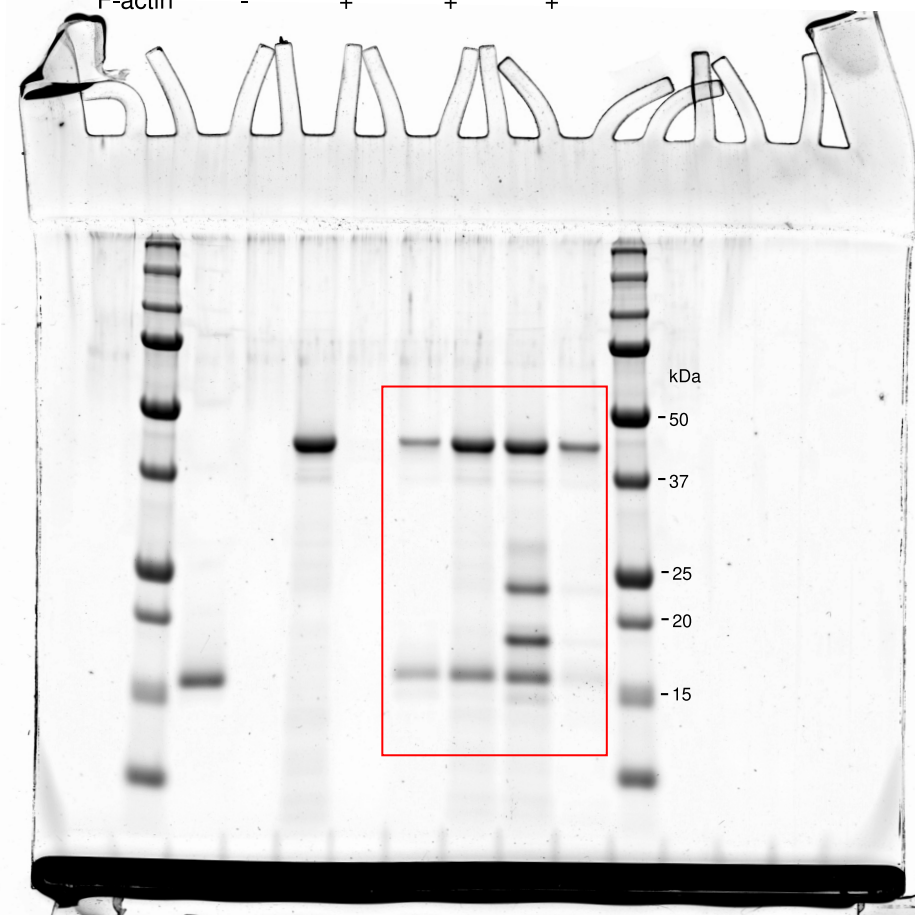

2E

|                      | S | P | S | P | S | P | S | P |
|----------------------|---|---|---|---|---|---|---|---|
| TLNRD1 <sup>4H</sup> | + | - | - | + | + | - | - | + |
| CCM2 <sup>CTH</sup>  | - | - | - | - | - | - | - | + |
| F-actin              | - | + | + | + | + | + | + | + |

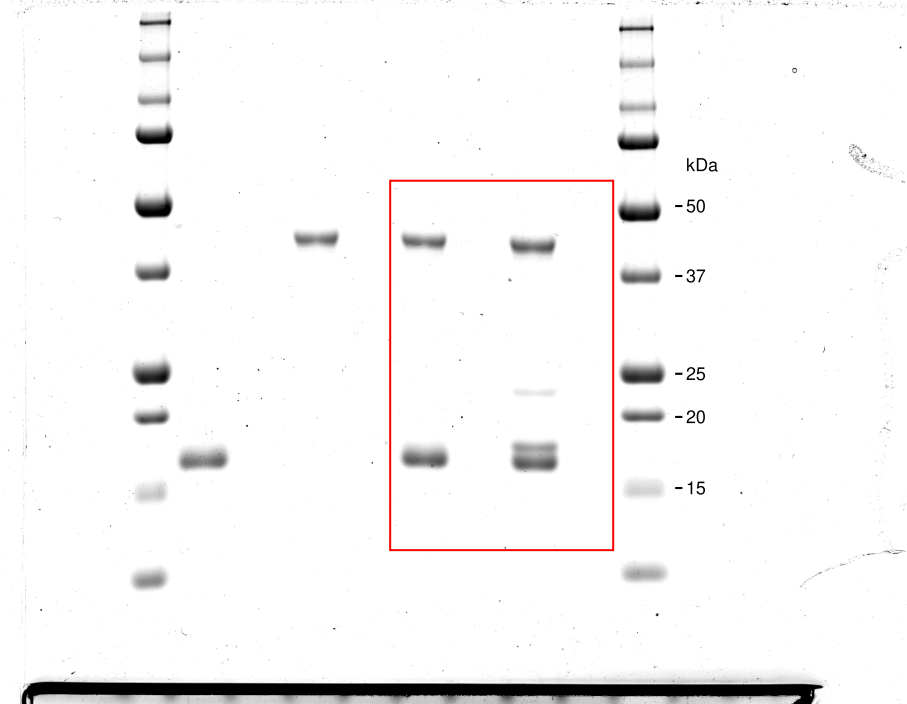

Supplement: JCB_202310030_SourceDataF7.pdf [file JCB_202310030_SourceDataF7.pdf]
